# Supplementary material
Source: publisher site journal article supplement (https://www.dovepress.com/article/555177)
Supplement: Supplementary file 1 [file 555177%20Supplementary%20Table.docx]

**Supplementary Table 1. Detailed methodological features of studies included in the scoping review.**

**AD: Alzheimer’s Disease; CTQ: Circadian Type Questionnaire; ESS: Epworth Sleepiness Scale; HPA: Hypothalamic–Pituitary–Adrenal axis; KSS: Karolinska Sleepiness Scale; MEQ: Morningness-Eveningness Questionnaire; NREM: Non-Rapid Eye Movements (sleep); PSG: Polysomnography; PSQI: Pittsburgh Sleep Quality Index; REM: Rapid Eye Movements (sleep); SPAQ: Seasonal Pattern Affective Questionnaire; SWS: Slow Wave Sleep; TST: Total Sleep Time; WASO: Wake After Sleep Onset.**

| **Study** | **Study country** | **Study design** | **Sample size** | **Definition of healthy aging** | **Tools for studying sleep** | **Sleep-related parameters studied** | **Sleep timing** | **Sleep duration** | **Sleep continuity** | **Sleep architecture** | **Chronotype and circadian rhythms** | **Sleep quality** | **Comparison between objective and subjective measures** | **Key findings** |
| --- | --- | --- | --- | --- | --- | --- | --- | --- | --- | --- | --- | --- | --- | --- |
| Nakazawa et al. (1991) [48] | Japan | Cross-sectional study | 7 healthy older adults (5 males and 2 females, mean age 63.7±8.0 years, 50-73 years) vs 7 healthy younger adults (7 male university students, mean age 21.1±2.3 years, 18-24 years) and a man aged 108 years, with mild deafness and using a wheelchair | Free from insomnia, physical, and mental diseases | Sleep diaries | Sleep timing and sleep-related body rectal temperature rhythms in older vs. younger adults | Negative correlation between the time of falling asleep and age (r=-0.8423, p<0.05). Marginal correlation between the time of final awakening and age (r=-0.7375) | NA | NA | NA | Advanced acrophase time in the elderly group (p<0.01)  Negative relationship between age and the peak timing of temperature rhythms in the older group (r=-0.9526, p<0.001) | NA | NA | Advanced sleep phase and earlier bedtimes in older adults |
| Dykierek et al. (1998) [46] | Germany | Cross-sectional study | 42 healthy elderly (64.4±7.5 years, 22 male, 20 female) versus 35 subjects with Alzheimer’s disease (aged 62.1±8.9 years; 16 male, 19 female) and 39 depressed patients (aged 67.7+9.8 years, 8 male, 31 female) | Free from narcolepsy and major sleep issues, as well as from physical and mental diseases | PSG | Sleep architecture in elderly vs. Alzheimer's and depression patients | NA | Sleep period time was decreased in depressed patients | NA | Only a few differences among the groups, with depressed patients having a smaller amount of stage 2 and a greater amount of REM sleep. All three groups had little stages 3 and 4 sleep (SWS)  REM-related parameters differed among the three groups | NA | NA | NA | Altered REM density and sleep architecture with aging |
| Hoch et al. (1988) [53] | USA | Cross-sectional study | 23 healthy elderly (aged 68.9±3.8 years, 63-75 years, 8 men and 15 women) versus 20 AD (aged 71.6±4.9 years, 62-79 years, 7 men and 13 women) and 23 depressed elderly (70.1±5.6 years, 60-79 years, 4 men and 19 women) | Free from physical and mental diseases, and sleep issues | PSG | Sleep architecture in elderly vs. Alzheimer's and depression patients | NA | NA | All the parameters differed among the three groups, except for sleep latency, which was comparable between depressed and healthy control subjects | Only stage 2 differed among the three groups, except for stage N, which was comparable between depressed and healthy control subjects, stage 1, and stages 3 and 4, which were similar in the three groups. Stage REM was borderline significant | NA | NA | NA | Altered REM density and sleep architecture with aging |
| Dodt et al. (1994) [51] | Germany | Cross-sectional study | Twenty healthy elderly subjects (10 healthy old men aged 70-92 years, mean 78.2 years; 10 healthy old women aged 70-88 years, mean 78.6 years) versus 16 young male controls (20-34 years, mean 24.9 years) | Fully self-sufficient, free from physical and mental diseases | PSG | HPA axis activity and sleep in the elderly | Earlier bedtimes (p<0.05) | No differences in sleep period time (464±4.2 min versus 466±2.7 min) | NA | Aged subjects spent more time awake and in SI, while time slept in S2 or SWS (S3 4- S4) and in REM was reduced  Aged men tended to spend more time in REM sleep than aged women (12.5±2.0% versus 7.6±1.2%, p<0.06)  The REM sleep latency was shortened in elderly men but not in women (51.9±9.1 min versus 127.4±15.3 min, p<0.05) | Increased ACTH and cortisol concentrations during total sleep time (4.27±0.48 pmol/1 versus 2.2±0.31 pmol/1, p<0.005; 231.42±22.07 nmol/l versus 182.1±11.1 nmol/I, p<0.07)  The first nocturnal rise in cortisol occurred earlier in the aged subjects (113.5±18.3 min versus 180.8±12.0 min, p<0.005) | NA | NA | Increased HPA axis activity and reduced SWS in the elderly |
| Spiegel et al. (1999) [45] | Switzerland | Longitudinal study | Fifty-seven (34 men, 23 women; mean age 63.5±3.7 years); thirty at the follow-up | Free from physical and mental diseases, and sleep issues | PSG | REM sleep characteristics and cognitive functions | NA | NA | NA | Healthy subjects had a higher number of brief arousal Type D in sleep stage 2, significantly higher REM density, more NREM shifts, longer REM latencies, and spent less time in REM sleep | NA | NA | NA | REM sleep parameters correlated with cognitive performance |
| Gori et al. (2004) [58] | Italy | Cross-sectional study | Twelve healthy very old subjects (2 male, 10 female, aged 85.4±7.8 years, 76–98 years) and 11 healthy old subjects (9 male, 2 female; aged 68.5±4.1 years, 61–75 years) | Fully independent, free from physical and mental diseases | PSG | Body movements during sleep in the elderly | NA | NA | Sleep latency was 27.7±24.7 min in the old group, 77.1±49.8 min in the very old group (p<0.01).  Fewer type A movements in stage 1 (p=0.001), SWS (p=0.007), REM (p=0.01) in the very old group | Stage 1 NREM 9.1±3.2% in the old group, 16.1±8.8% in the very old group (p<0.05)  SWS 30.2±5.1% in the old group, 21.3±10.3% in the very old group (p<0.05) | NA | NA | NA | Fewer body movements and disrupted sleep in older adults |
| Driscoll et al. (2008) [60] | Australia | Cross-sectional study | Sixty-four healthy elderly men and women aged 75 and older (mean age 79 years, 46.9% female, and 10.9% African American) | Free from physical and mental diseases, and sleep issues | PSG, sleep diaries, and actigraphy | Sleep quality and health in elderly men and women | Greater time spent asleep in women (p=0.0223) | NA | Lower sleep efficiency in men (p=0.030) | Less delta sleep in men (p=0.0006) | NA | No gender-specific differences | NA | Good sleep quality is maintained in healthy elderly, with some sex/gender-specific differences |
| Buysse et al. (1992) [44] | USA | Cross-sectional study | 45 healthy subjects over 78 years of age (21 male, 24 female; mean age 83.1±2.9 years) and 33 healthy subjects between 20 and 30 years of age (20 male, 13 female; mean age 24.9±3.0 years; 14 students) | Free from physical and mental diseases, and sleep issues, or with select chronic diseases stabilized | PSG and sleep diaries | Daytime napping and sleep patterns in older adults | Elderly subjects went to bed an average of 39 minutes earlier and woke up an average of 76 minutes earlier  The mean time of daytime naps was not different for elderly and young subjects | Elderly had a greater mean number of naps (3.4±1.3 versus 1.1±1.4, p=0.004)  Women were more likely to be more frequent nappers than men (p=0.09)  The 24-hour sleep fraction was comparable between the elderly and young subjects (0.32±0.04 versus 0.33±0.03, p=0.07) | Elderly subjects reported significantly longer nocturnal sleep latency and increased wakefulness | Elderly had less REM and SWS  Gender effects could be noted (higher in women; p=0.002)  Significant age x gender interaction effects were noted for self-reported sleep latency (shortest in young women, longest in elderly women; p=0.02) and REM latency (shorter in elderly men than women; p=0.01) There was a trend for shorter nocturnal sleep latency in the frequent nappers | The weekday-weekend difference in nap frequency was significant among elderly subjects (p=0.01) but not for young adult subjects (p=0.09) | Elderly subjects reported a higher degree of alertness upon awakening, comparable mood upon awakening, and poorer sleep quality  There was no significant difference in sleep quality between nappers and non-nappers  Worse sleep quality in men who were more frequent nappers and better sleep quality in men who were less frequent nappers, compared to women (p=0.01) | NA | Increased napping and fragmented nocturnal sleep in the elderly |
| Deantoni et al. (2023) [42] | Belgium | Cross-sectional study | 60 healthy seniors (average age 69, including 39 women and 21 men) | Free from physical and mental diseases, and sleep issues, or with select chronic diseases stabilized | PSG, actimetry, ESS, KSS, and circadian rhythm-related scales (SPAQ and MEQ) | Napping and circadian rhythms in seniors | Daytime rest timing did not differ between nappers and non-nappers for which at least one daytime rest period was detected across the recording (n=25), even if nappers reported higher nap daily frequency  (0.73±0.32 versus 0.26±0.21, p=0.006) | Nappers had longer daytime rest (49.95±14.22 min versus 32.87±21.79, p=0.0007) | NA | Nappers were characterized by higher sleep efficiencies and REM sleep proportion during day- compared to nighttime naps; they exhibited a greater percent of stage 1, 8.2± 2.1% versus 6.3±2.5%, p=0.001) during the nighttime sleep  Reduced N3% over all circadian phases was associated with increasing age and with being male (p<0.05)  Increasing age was associated with higher sleep efficiencies (p<0.05), while men presented lower overall sleep efficiencies (p<0.05) | Nappers felt significantly sleepier (ESS, p<0.05) and presented higher seasonality scores (SPAQ, p<0.01)  No differences between nappers and non-nappers in terms of MEQ  Nappers presented a significantly reduced fitted melatonin amplitude (p<0.05) | No differences between nappers and non-nappers in terms of PSQI | NA | Napping is associated with altered circadian rhythms |
| Xin et al. (2020) [50] | China | Cross-sectional study conducted as an ancillary analysis utilizing baseline data from the “China Health and Retirement Longitudinal Study” (CHARLS) | 7,469 participants, 13.7% of whom were successful agers | Successful aging as defined using Rowe and Kahn's multidimensional framework (i) no major diseases, ii) no disability, iii) high cognitive functioning, iv) high physical functioning, and v) active engagement with life. | PSQI | Daytime napping and successful aging | NA | Nighttime sleep < 6 h/night (n=2,558), 6-8 h/night (n=2,640), and >8 h/night (n=2,271)  40.5% reported no daytime napping (0 min/day), 39.4% moderate daytime napping (1–60 min/day), and 20.1% long daytime napping (> 60 mins/day). The overall mean duration of daytime napping was 40.8±0.5 mins and 68.6±0.6 mins in habitual nappers  > 60 mins/day napping group was associated with lower odds of achieving successful aging (OR, 0.762; 95% CI, 0.583–0.996) | NA | NA | NA | NA | NA | Long daytime naps linked to reduced successful aging |
| Campbell et al. (2007) [61] | USA | Cross-sectional study | 50 healthy participants aged 19 to 81 years (28 females, 22 males, mean years 46.5±20.5 years; 17 young, 15 middle, and 18 older subjects) | Free from major medical issues or with mild stabilized diseases | PSG | Natural sleep patterns across age groups | No difference in the timing of naps among age groups | Older subjects slept 2.4 h less per 24 h compared with young subjects | Less efficiency in older subjects | Less REM sleep minutes in older subjects; no differences in SWS; different architecture in the daytime sleep, with absent REM and SWS | Circadian sleep propensity phase-advanced in the old group, with peak sleep tendency occurring 2–3 h earlier | NA | NA | Sleep duration decreases with age but stabilizes after 60 |
| Shi et al. (2021) [47] | USA | Ancillary analysis from the “Nurses’ Health Study” (NHS), a prospective cohort study of 121,701 US registered nurses aged 30–55 in 1976 | 12,304 and 14,729 women aged 70 years and older for the primary and secondary analyses, respectively | Healthy ageing, defined as based on four domains: i) chronic diseases, ii) cognitive function, iii) physical function, and iv) mental health | Self-reported measures | Sleep duration and healthy aging | NA | Women with shorter and longer sleep duration are less likely to achieve healthy aging (OR for those sleeping ≤5, 6, 8, and ≥9 hours 0.93 [95%CI 0.69-1.24], 0.87 [95%CI 0.75-1.01], 0.83 [95%CI 0.71-0.96], and 0.59 [95%CI 0.42-0.82], respectively);  shorter sleep associated with lower odds of no limitation of mental health (OR for ≤5 versus 7 hours: 0.73 [95%CI 0.60-0.88]) and no impairment of cognitive function (OR 0.67 [95%CI 0.51-0.88]), longer sleep duration associated with lower odds of good physical function (OR for ≥9 versus 7 hours 0.69 [95%CI 0.56-0.86]), no limitation of mental health (OR 0.83 [95%CI 0.69-0.99]) and no impairment of cognitive function (OR 0.74 [95%CI 0.57-0.97]) | NA | NA | NA | NA | NA | Non-linear relationship between sleep duration and healthy aging (p=0.0073; p=0.0004 with no impairment of physical function;  p=0.0002 with no mental health limitations,  p=0.0336 with no impairment of cognitive function, p=0.1064 with  no major chronic disease); snoring is associated with reduced odds of healthy ageing |
| Liu et al. (2016) [52] | China | Cross-sectional study as an ancillary analysis utilizing baseline data from the “China Health and Retirement Longitudinal Study” (CHARLS) | 5,616 healthy elderly aged 60 years and older (2,966 male and 2,650 female) | Successful aging as defined using Rowe and Kahn's multidimensional framework (i) no major diseases, ii) no disability, iii) high cognitive functioning, iv) high physical functioning, and v) active engagement with life. | PSQI | Sleep patterns and successful aging in Chinese elderly | NA | 6.2±2.0 hours on average, with 34.1%, 20.5%, 16.6%, 20.7%, and 8.1% reporting <6 h, 6 h, 7 h, 8 h, and ≥9 h | NA | NA | NA | 47.4% reported poor sleep less than one day per week, 16.6% one to two days per week, 15.3% three to four days per week, and 20.7% five to seven days per week  Elderly reporting poor sleep five to seven days a week showed a lower ratio of successful aging (OR=0.29, 95% CI 0.21-0.39) | NA | Inverse U-shaped curve for sleep duration and successful aging |
| Buysse et al. (1991) [56] | USA | Cross-sectional study | 44 healthy subjects over 80 years (20 men, 24 women) and 35 healthy subjects between 20 and 30 years (23 men, 12 women) | Free from physical and mental diseases or with some select chronic conditions stabilized | PSG, PSQI, Home-Ostberg Morningness Questionnaire, CTQ | Self-reported sleep quality in older adults | NA | NA | Elderly had a greater number of arousals 3-15 seconds in duration (p=0.0001), a higher mean Apnea Index (p=0.004), AHI (p=0.0001), and PLM Arousal Index (p=0.0001)  Few gender or age-gender interaction effects noted: . AHI (p = 0.04) and Apnea Index (p = 0.05) were larger in men | REM latency decreased with age in men (p=0.02), but not in women | Elderly more morning types (p=0.0001), earlier reported mean goodnight times (p=0.02), and a trend toward earlier reported good morning times (p=0.08) | Mean PSQI global scores were higher for elderly than young subjects (p=0.0003). Elderly subjects had greater variability in PSQI scores  68.1 % of elderly subjects versus 97.1 % of young subjects classified as "good" sleepers (p=0.001)  Age effects for subjective sleep quality (p=0.003), sleep duration (p=0.01), habitual sleep efficiency (p=0.0005)  No gender effects, with the exception of daytime dysfunction (greater in men; p=0.01) Age-gender interactions found for subjective sleep quality (p=0.04) and sleep latency (p=0.02), with greater deterioration in women | No correlations in the elderly, but correlations in the young subjects | Subjective sleep quality declines with age |
| Danker-Hopfe et al. (2006) [59] | Germany | Longitudinal study | 91 subjects (46 males and 45 females, aged 66.7±5.8 years, 60-85 years); n=75, compliance rate of 82.4% at the follow-up (16±5 months, 8-27 months) | Free from physical, neuropsychiatric diseases, and sleep issues/complaints | PSQI | Perceived sleep quality and its temporal stability in the elderly | NA | NA | NA | NA | NA | Sleep quality at baseline (p<0.0001) and gender (p=0.0469) were significant predictors of sleep quality at follow-up (R2=0.3300), with a correlation of rSP=0.5416 (p<0.001) | NA | Sleep quality remains stable over time in the elderly |
| Vitiello et al. (2004) [57] | USA | Cross-sectional study | 150 healthy older (67.5±0.5 years; 55 men and 95 women) versus 9 healthy young men | Free from physical and mental diseases, and sleep issues | PSG and PSQI | Sleep quality and gender differences in older adults | NA | Women had greater total sleep time (389.0±5.7 versus 367.3±7.9, p<0.05) | Elderly had less sleep efficiency than younger subjects (by 13.3%), with greater time in bed (by 13.1%), sleep latency (by 119.0%), total wake time (by 297.6%), and wake after sleep onset (by 329.3%)  Women had greater sleep efficiency (83.0±0.9 versus 80.9±1.3, p<0.07) and less wake after sleep onset (60.6±3.3 versus 70.7±6.0, p<0.05)  Sleep latency and total wake time did not differ between men and women | Elderly had less REM (by 29.9%) and SWS (by 74.1%) than younger subjects  Women had greater SWS (6.8±0.7 versus 1.8±0.3, p<0.01) and REM (18.0±0.6 versus 15.5±0.8, p<0.05) | NA | Women had significantly higher PSQI scores than men (4.7±0.3 versus 3.4±0.3, p<0.01)  33% of women versus 16% of men were poor sleepers (p<0.001) | Correlations between PSQI and time in bed (r=0.44, p<0.000), total sleep time (r=0.29, p<0.000), total wake time (r=0.27, p<0.001), sleep efficiency (r=0.24, p<0.003) and sleep latency (r=0.16, p<0.05) | Gender-specific differences in objective and subjective sleep |
| Gkotzamanis et al. (2023) [43] | Greece | Prospective observational study | 1,226 older adults (aged ≥65 years, 704 women) | A healthy aging metric (Healthy Aging Index), based on an Item Response Theory approach applied to validated questionnaires assessing functionality, which identified four healthy aging trajectories (high-high, high-low, low-high, and low-low) | Sleep Index II | Sleep quality and healthy aging trajectories | NA | 68% of regular sleepers (59% in the low-low group, 70% in the low-high group, 70% in the high-low group, 76% in the high-high group, p<0.001);  24% of short-sleepers (30% in the low-low group, 24% in the low-high group, 22% in the high-low group, 19% in the high-high group; p<0.001); 8% of long-sleepers (11% in the low-low group, 6% in the low-high group, 8% in the high-low group, 5% in the high-high group, p<0.001) | NA | NA | NA | Overall sleep quality 17.5+7.5; 19.7+8.6 in the low-low group, 17.7+6.9 in the low-high group, 16.6+7.2 in the high-low group, 15.6+6.2 in the high-high group (p<0.001) | NA | Good sleep quality positively associated with healthy aging |
| Campbell et al. (1989) [55] | USA | Cross-sectional study | 22 healthy elderly men and women (10 males, 12 females; average age: 69.29±7.49 years) | Non-institutionalized, free from sleep issues, physical and mental diseases | Self-reported sleep measures | Circadian rhythms and sleep quality in older adults | Despite similar bedtimes, women tended to wake up earlier than men; the peak body temperature timing was strongly linked to both bedtime and wakeup time | Women had shorter sleep durations than men | NA | NA | Peak timing of body temperature in older women was found to be about 1.25 hours earlier than in men of the same age. | Women reported lower satisfaction with their sleep than men | NA | Gender differences in circadian rhythm and sleep satisfaction |
| Bliwise (1992) [54] | USA | Ancillary cross-sectional analysis from a longitudinal study (the Sleep and Aging Program Study) | 38 elderly (mean age 67.9±9.3 years) women (68.4±8.7 years, range: 49-82 years for poor sleepers; 67.5±9.9 years, range: 52-95 years for good sleepers) | Non-institutionalized, free from sleep issues, physical and mental diseases, with subjective good health | PSG and sleep-related questionnaires | Psychological determinants of sleep quality | Poor sleepers tended to go to bed later (11:20±43 p.m.) than good sleepers (10:48±55 p.m.) | TST lower in poor sleepers (378.2±57.1) than in good sleepers (419.0±73.8) | Time to fall asleep was longer in poor (24.3±20.3) compared with good (9.7±6.1) sleepers | NA | NA | 22 were good sleepers, 16 were poor sleepers | PSG data were consistent with self-identification as good and poor sleepers | TST, sleep efficiency, sleep latency, and WASO;  poor sleepers report more psychological symptoms (somatic symptoms and symptoms of phobic anxiety, paranoid ideation, and psychoticism; trends for obsessive-compulsive, general anxiety, and depressive symptoms) |
